# Supplementary material for: Current challenges in modelling far-range air pollution induced by the 2014–2015 Bárðarbunga fissure eruption (Iceland)
Source: Copernicus journal article supplement (doi:10.5194/acp-16-10831-2016), 2016-08-31
Supplement: Supplementary file 1 [file acp-16-10831-2016-supplement.zip]

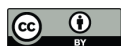

*Supplement of*

**Current challenges in modelling far-range air pollution induced by the 2014–2015 Bárðarbunga fissure eruption (Iceland)**

**Marie Boichu et al.**

*Correspondence to:* Marie Boichu ([marie.boichu@univ-lille1.fr](mailto:marie.boichu@univ-lille1.fr))

- [acp-16-10831-2016-supplement-title-page.pdf](#)
- [movie\\_BAR14\\_4b\\_BoichuEtAl\\_ACP16.gif](#)

The copyright of individual parts of the supplement might differ from the CC-BY 3.0 licence.
